# Supplementary material
Source: Research Square preprint supplement (doi:10.21203/rs.3.rs-9477802/v1)
Supplement: Supplementary file 1 [file be5b87300226b5993a137921.docx]

**Supplementary Information**

**
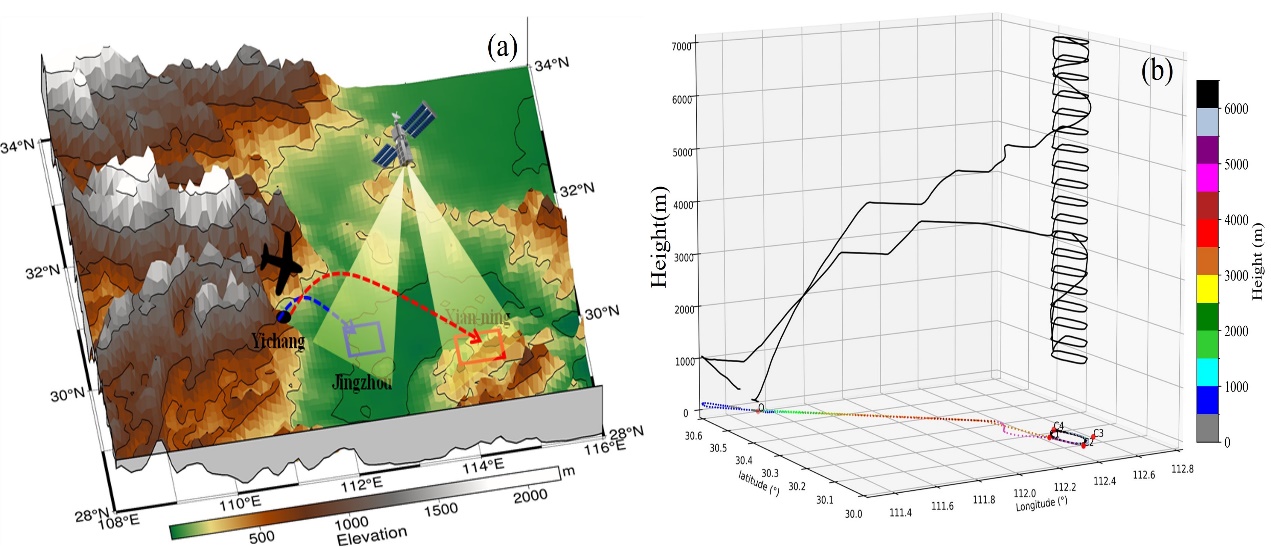
**

**Fig. S1.** Schematic map of aircraft and satellite observations. (a) Terrain map overlaid with the overall aircraft flight overview. (b) Detailed flight tracks of the aircraft within the operational area.

**Table S1.** Summary of the flights used in this study.

| **Flight** | **Date** | **Time range**  **(UTC)** | **Maximum altitude(m)** | **Weather** |
| --- | --- | --- | --- | --- |
| F1 | 20180629 | 01:48-04:08 | 4722 | Cloudy |
| F2 | 20200618 | 02:40-04:40 | 7335 | Rainy |
| F3 | 20200704 | 02:50-04:05 | 7339 | Rainy |

**
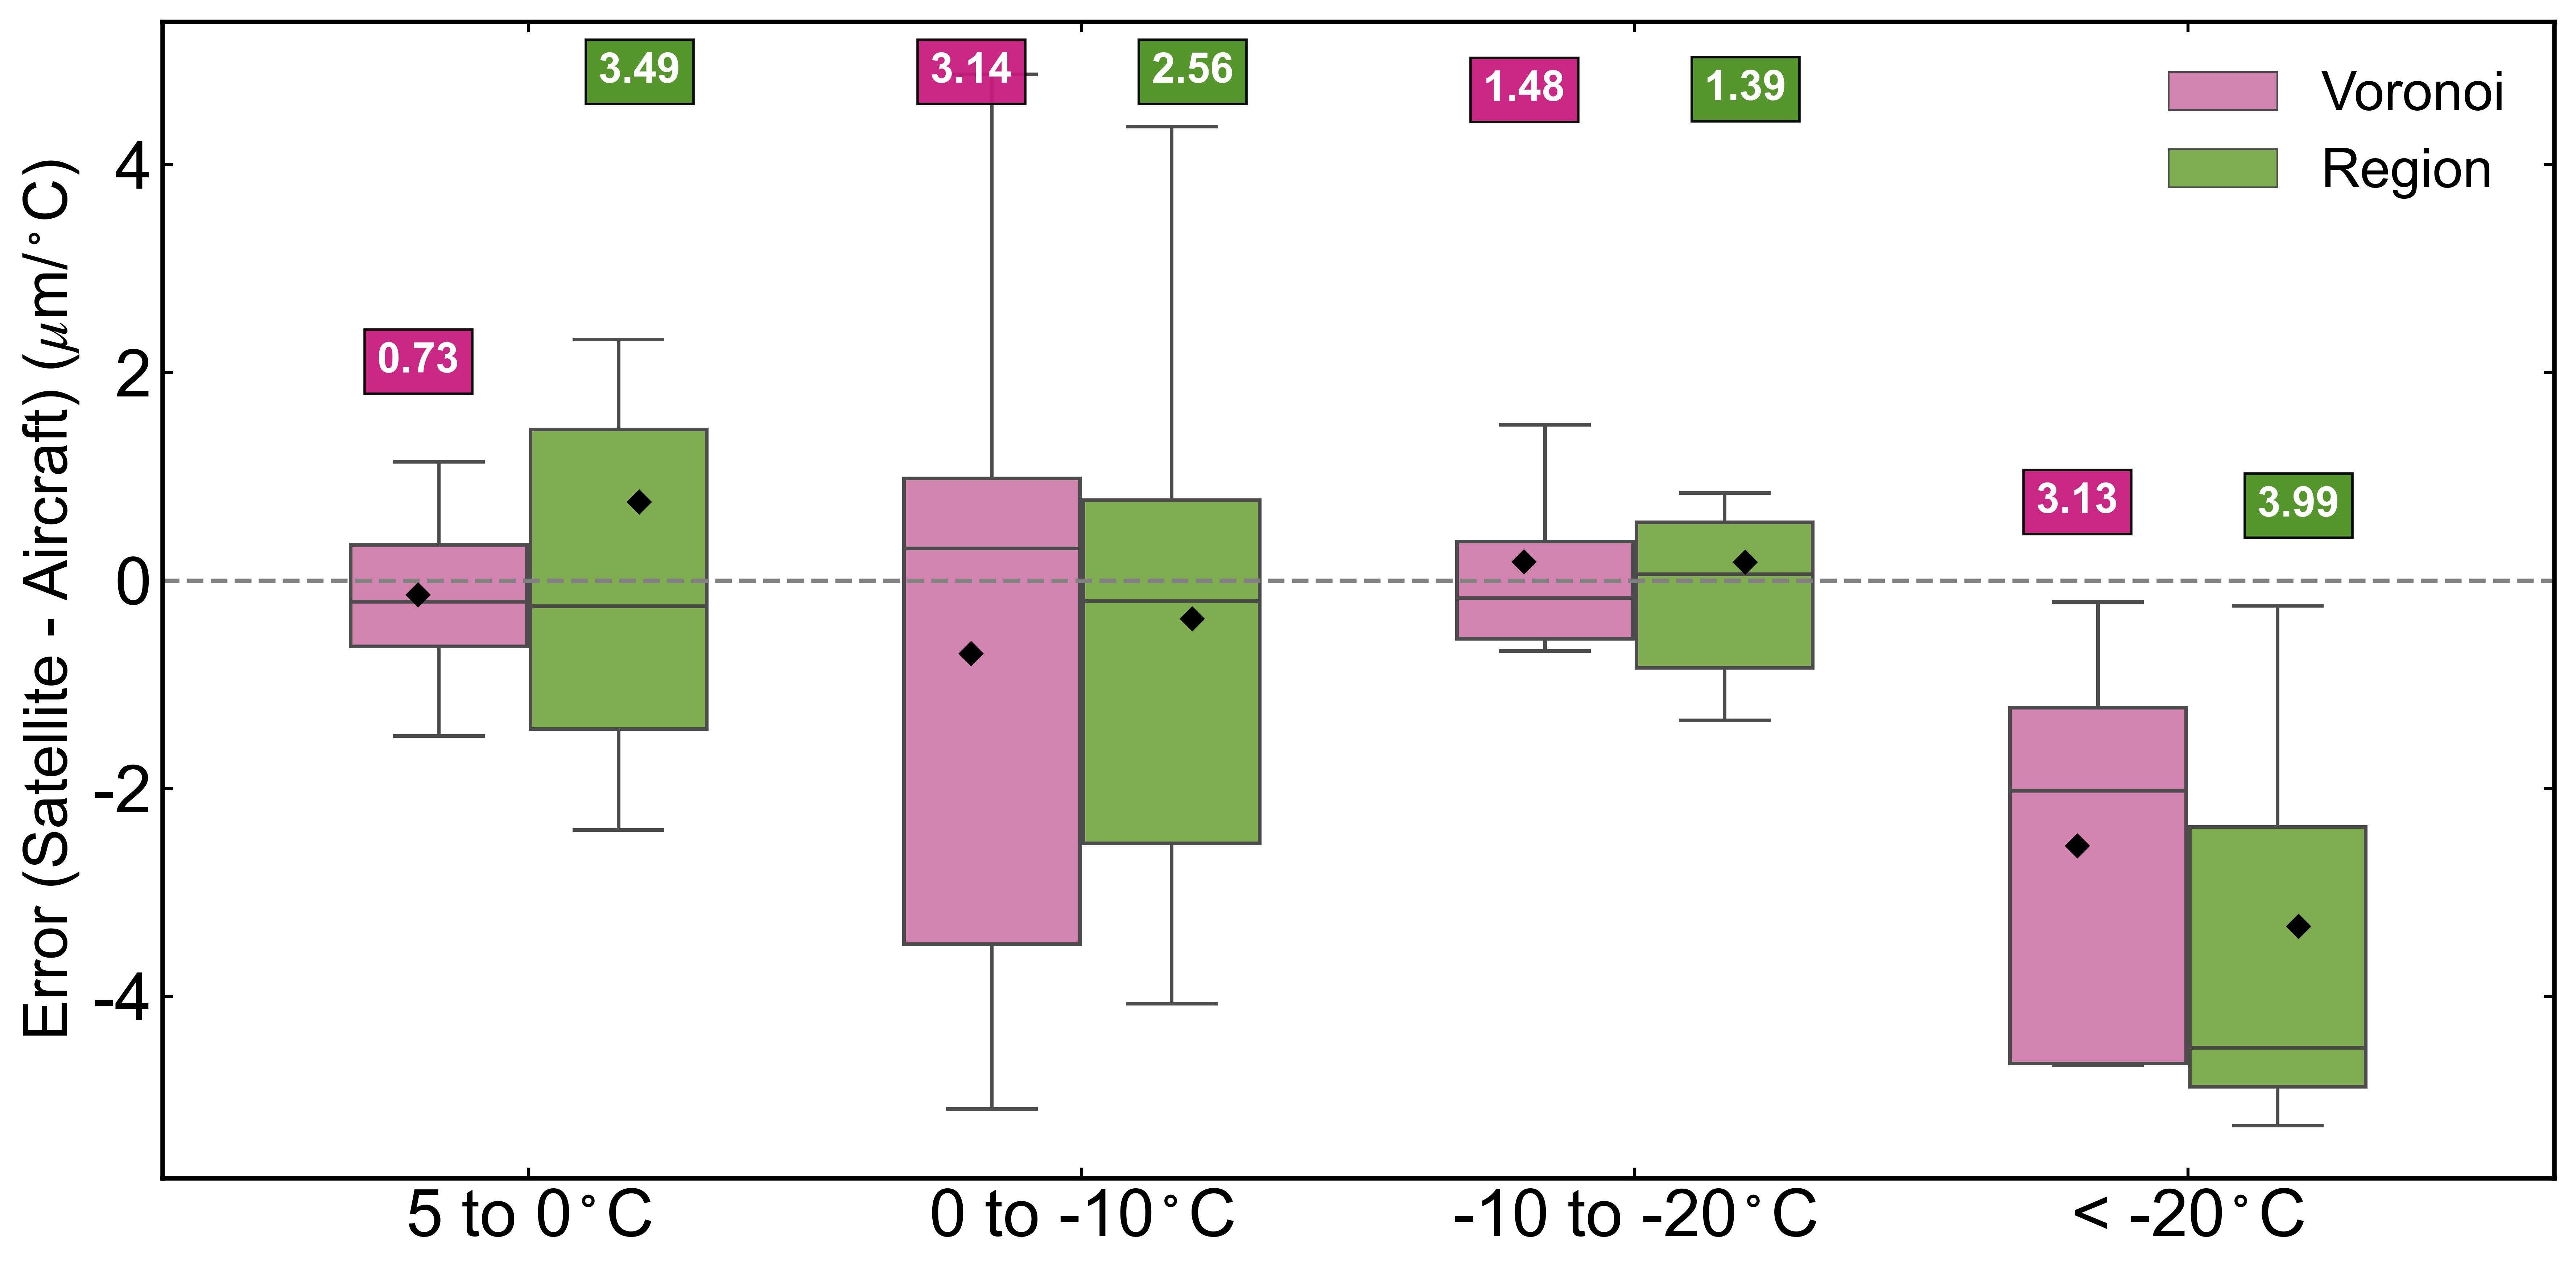
**

**Fig.S2** Distribution of CER vertical-gradient errors from the Voronoi and conventional Region retrievals relative to aircraft in situ observations for four temperature intervals: 0 to 5 °C, -10 to 0 °C, -20 to -10 °C, and < -20 °C. Errors are calculated as satellite minus aircraft CER gradients (μm °C-1). Boxes show the interquartile range, center lines mark the median, and whiskers extend to 1.5 × IQR. Colored diamonds represent the mean error. Colored square annotations show the RMSE value for each method in each temperature interval.

**
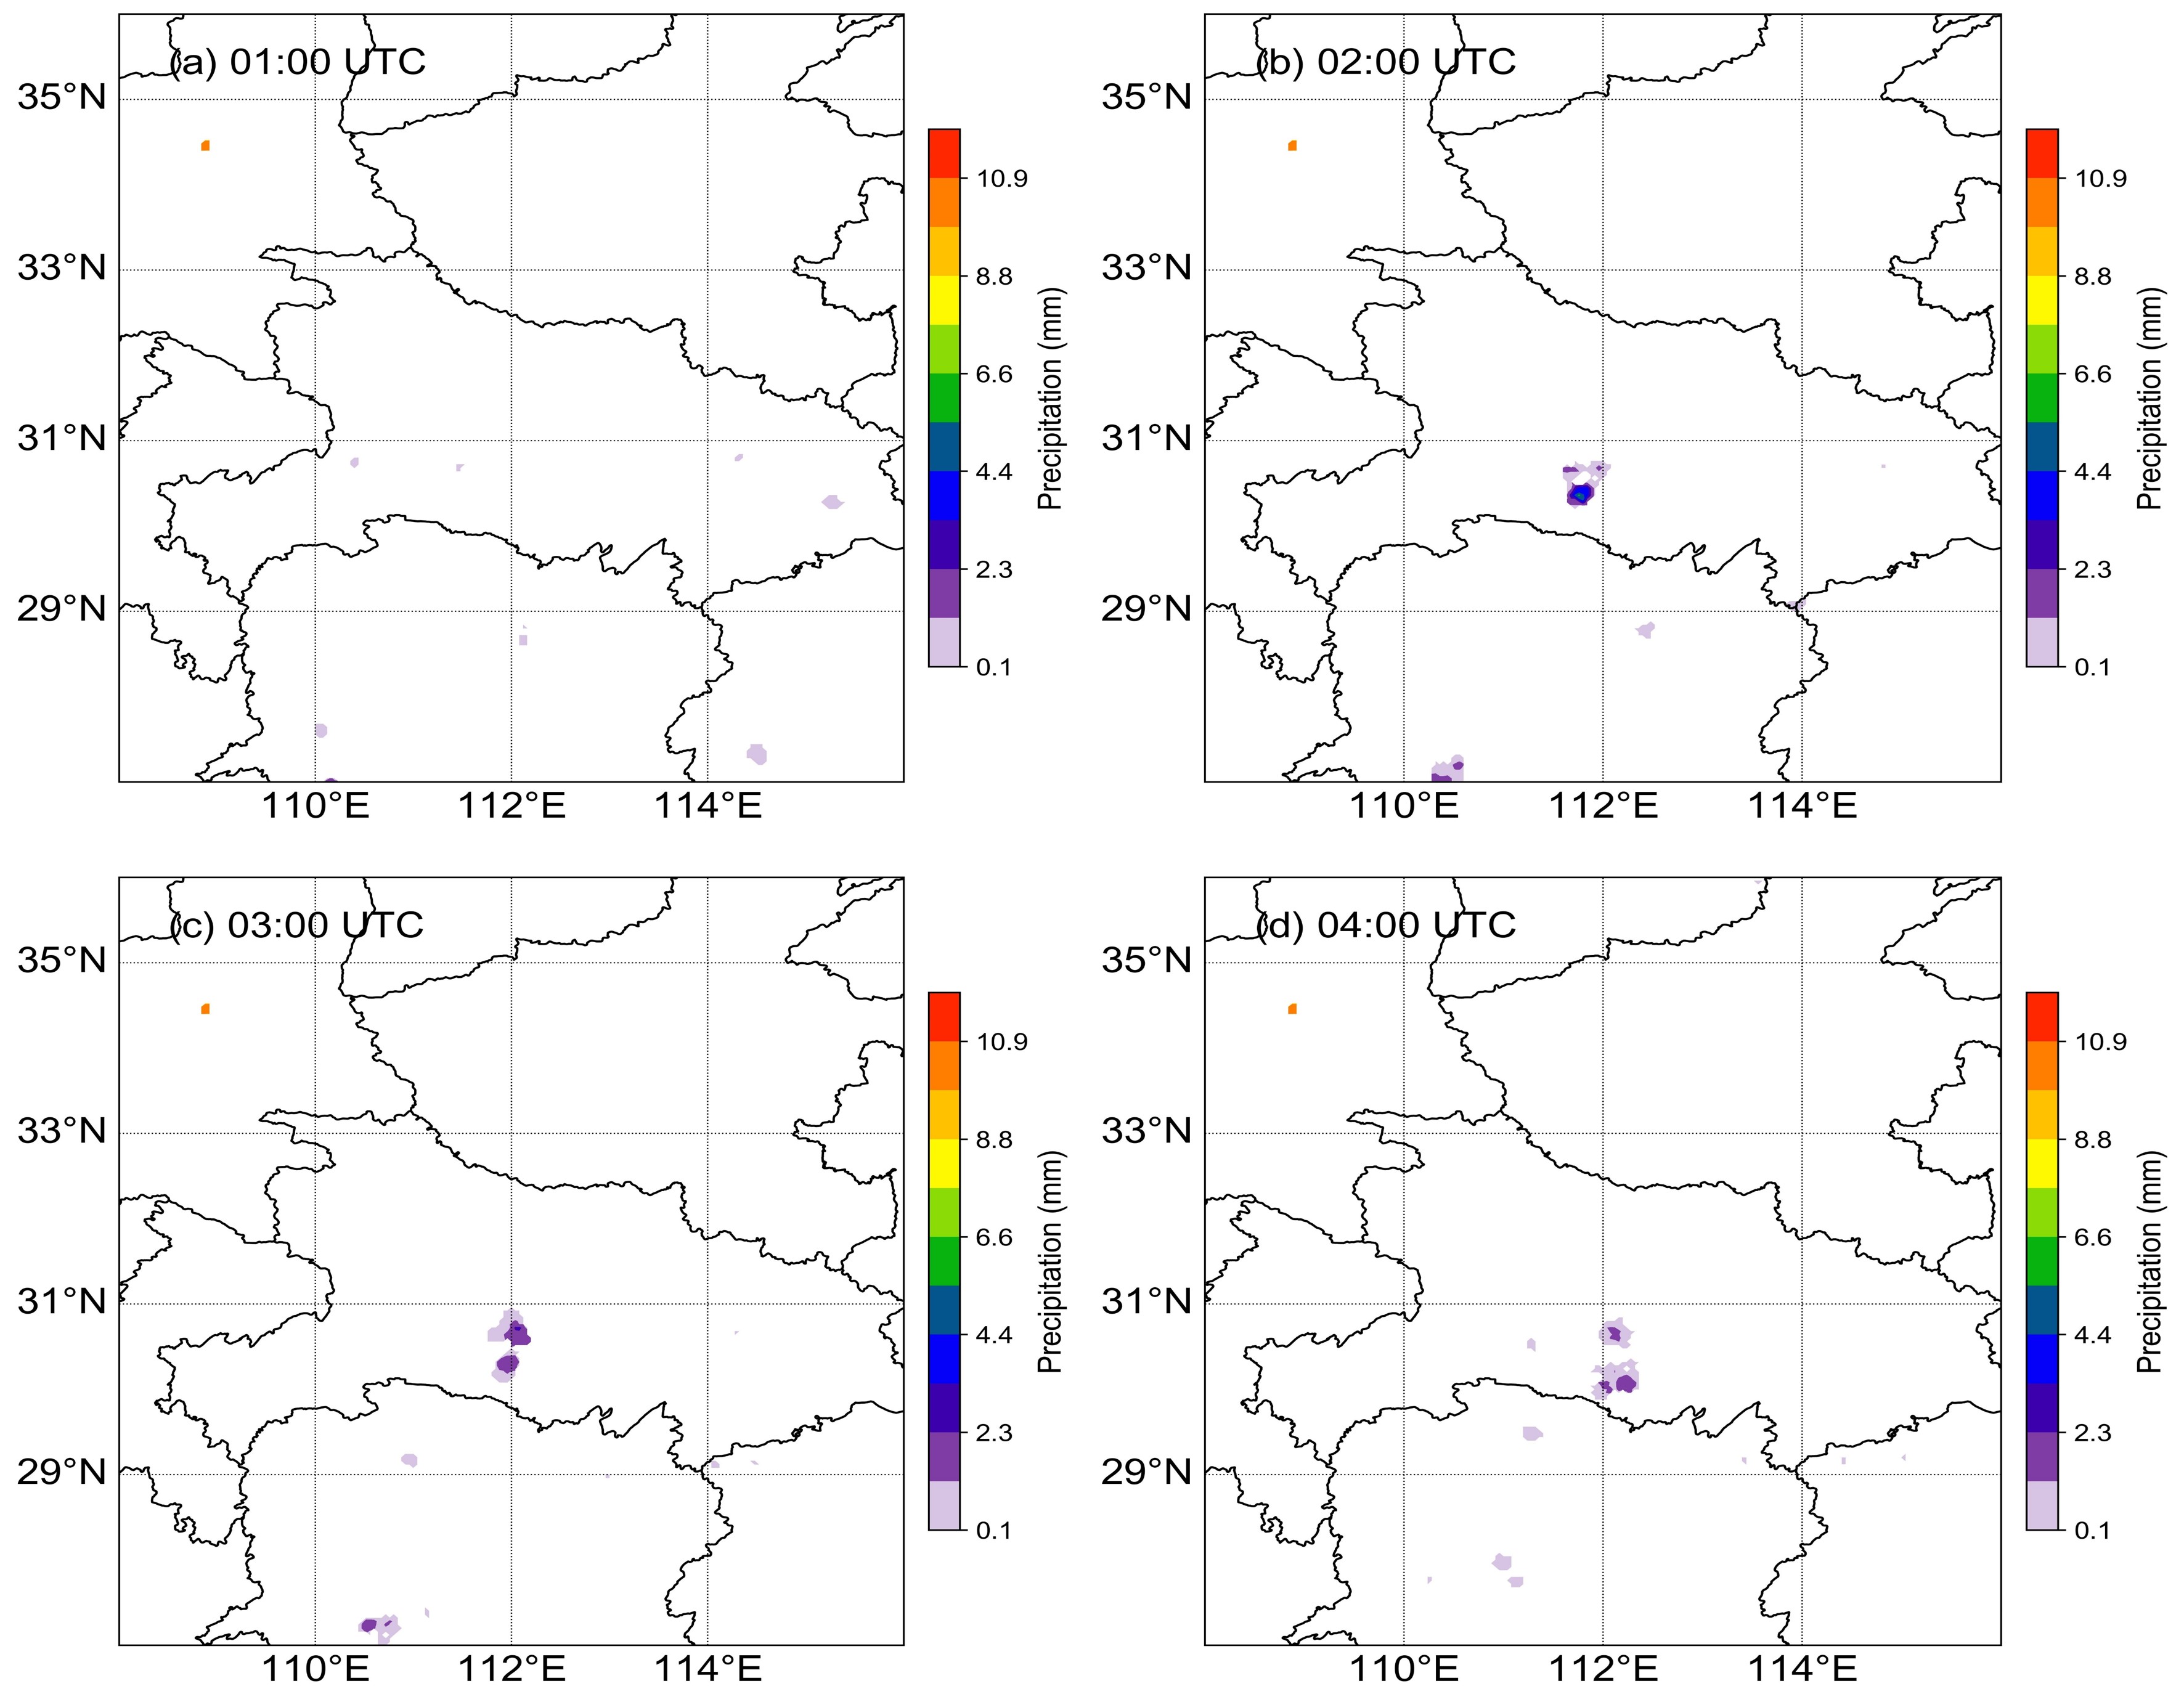
**

**Fig S3**. Spatial distribution of surface precipitation rate (mm h⁻¹) for the case study on 1 June 2022 at (a) 01:00, (b) 02:00, (c) 03:00, and (d) 04:00 UTC, derived from quality-controlled automatic weather station observations resampled to a 0.04° grid using radial basis function interpolation. Black contours delineate the cloud cluster boundary (10.8 μm brightness temperature < 280 K). The intensification of surface precipitation from panel (a) to (d) is consistent with the stage-dependent CER evolution described in the text.


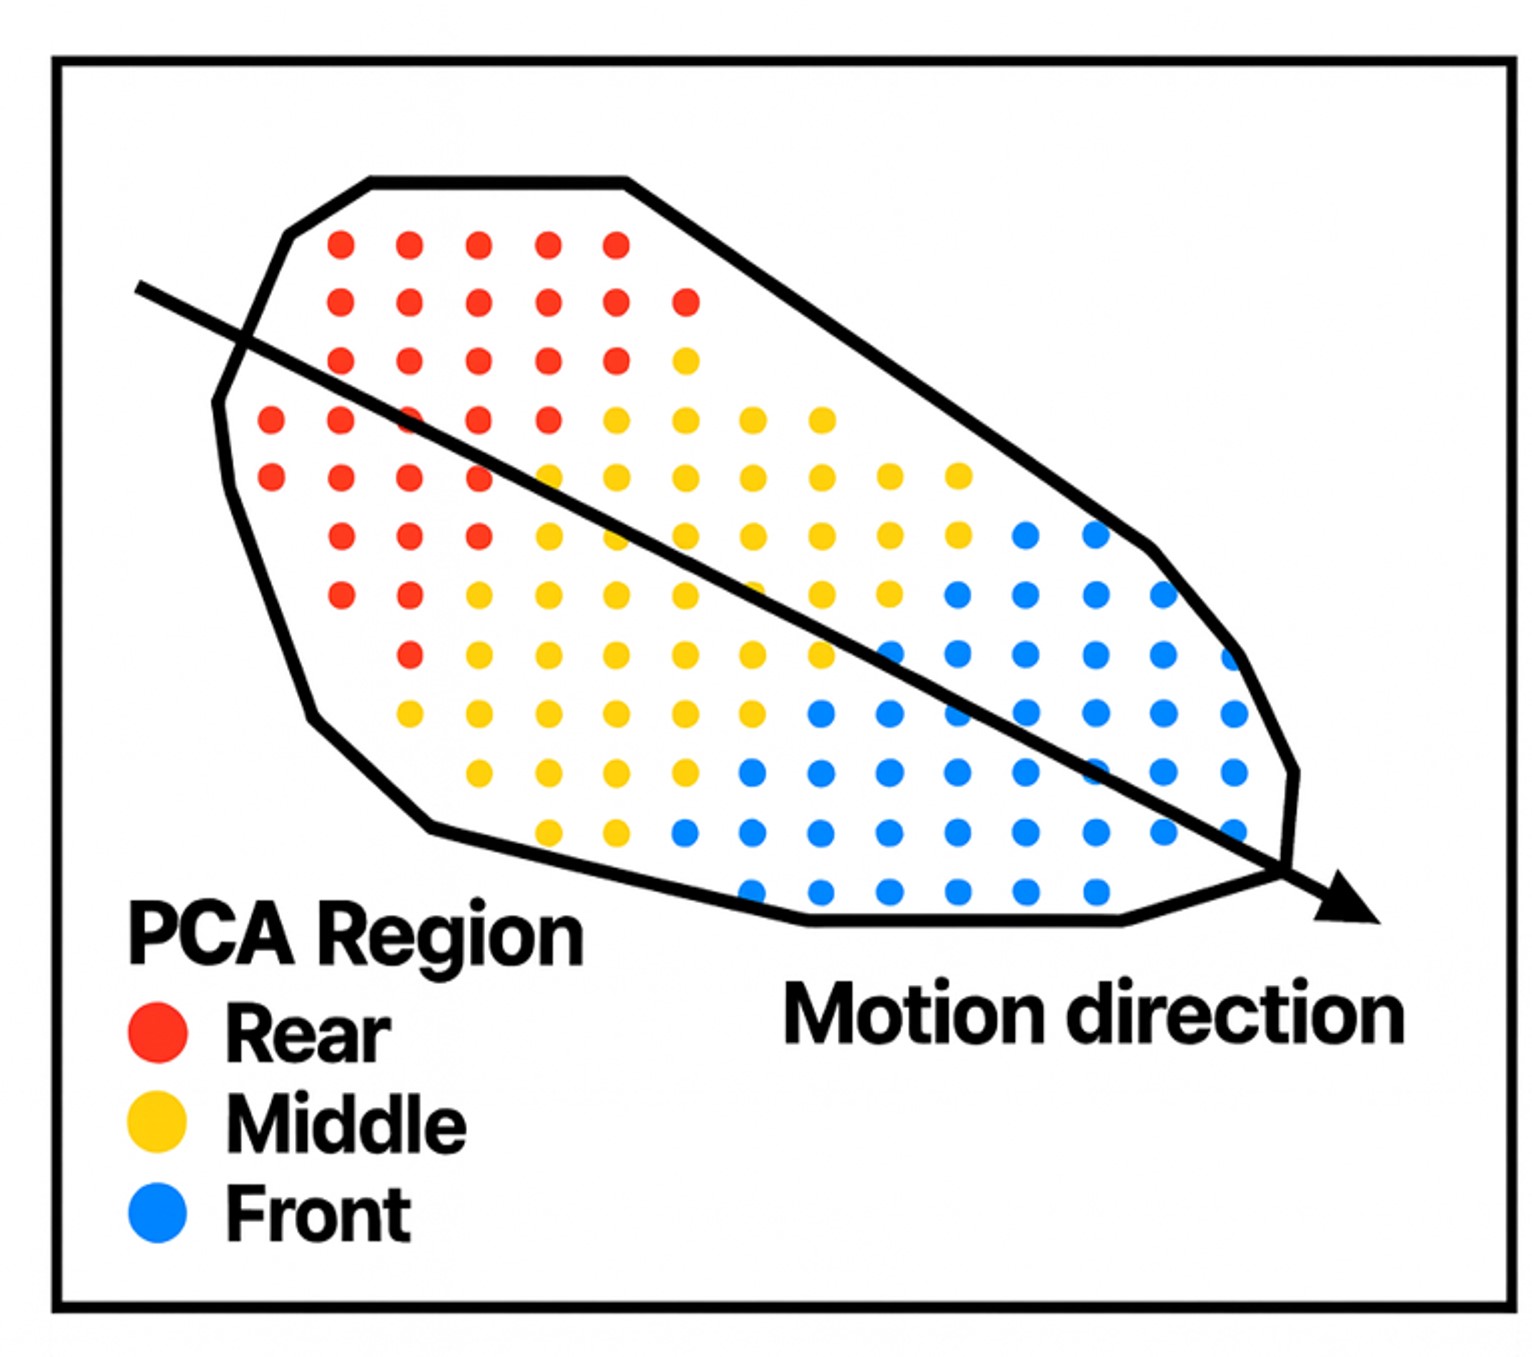


**Fig S4** Principal component analysis (PCA) for sector partitioning.


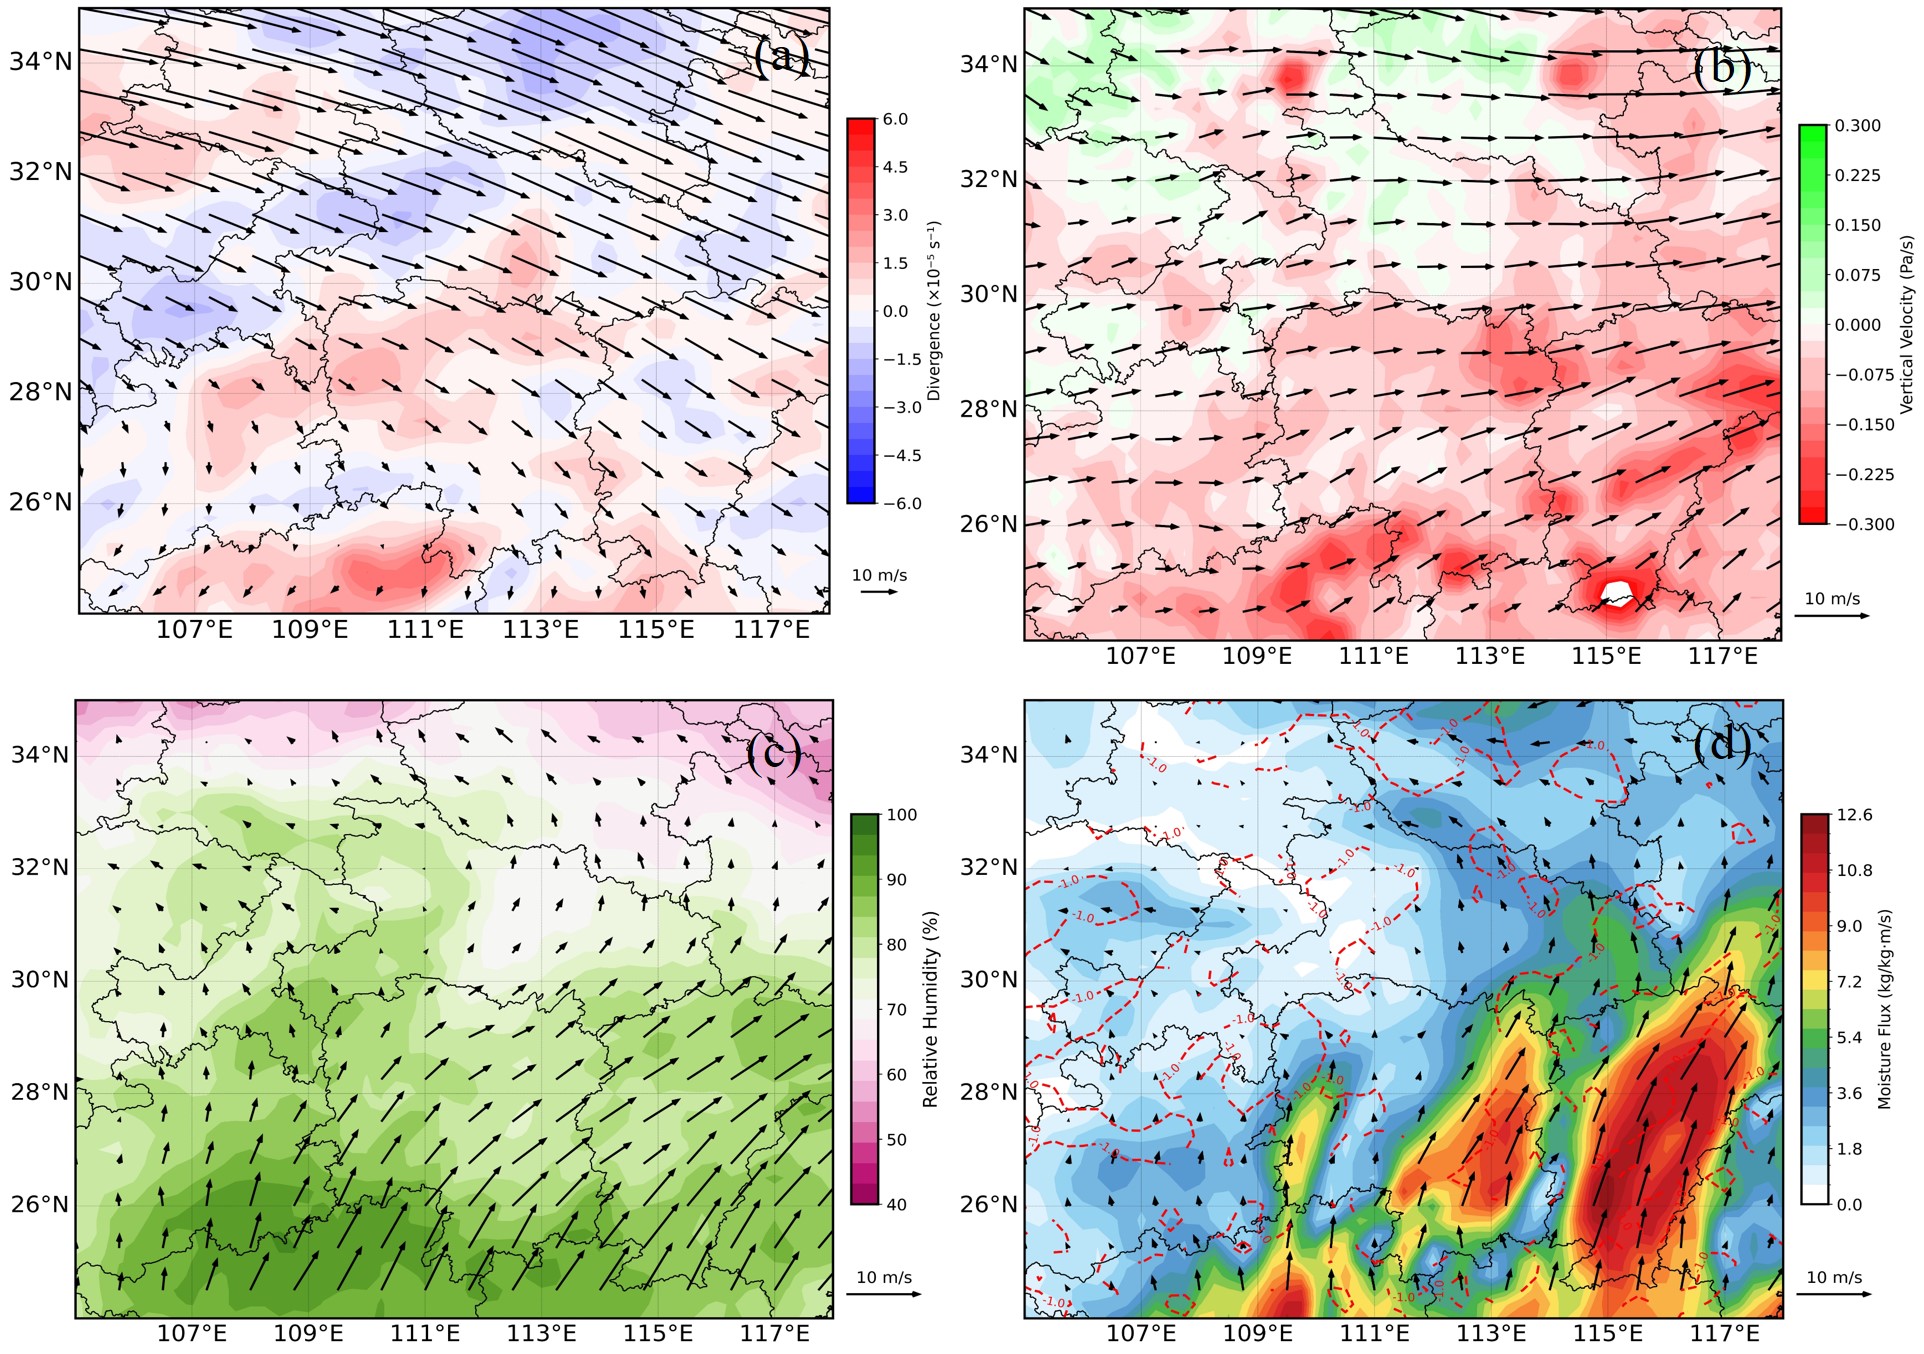


**Fig S5.** ERA5 composite dynamical and thermodynamic fields for 162 propagating convective systems (EPCSs). (a) 200 hPa wind vectors overlaid with divergence (s⁻¹). (b) 500 hPa wind vectors overlaid with vertical velocity (Pa s⁻¹), with upward motion (negative values) shaded in blue. (c) 850 hPa wind vectors overlaid with relative humidity (%). (d) 925 hPa wind vectors overlaid with water vapor flux (kg kg⁻¹ m s⁻¹); the red dashed contour denotes the 1.0 kg kg⁻¹ m s⁻¹ isoline.


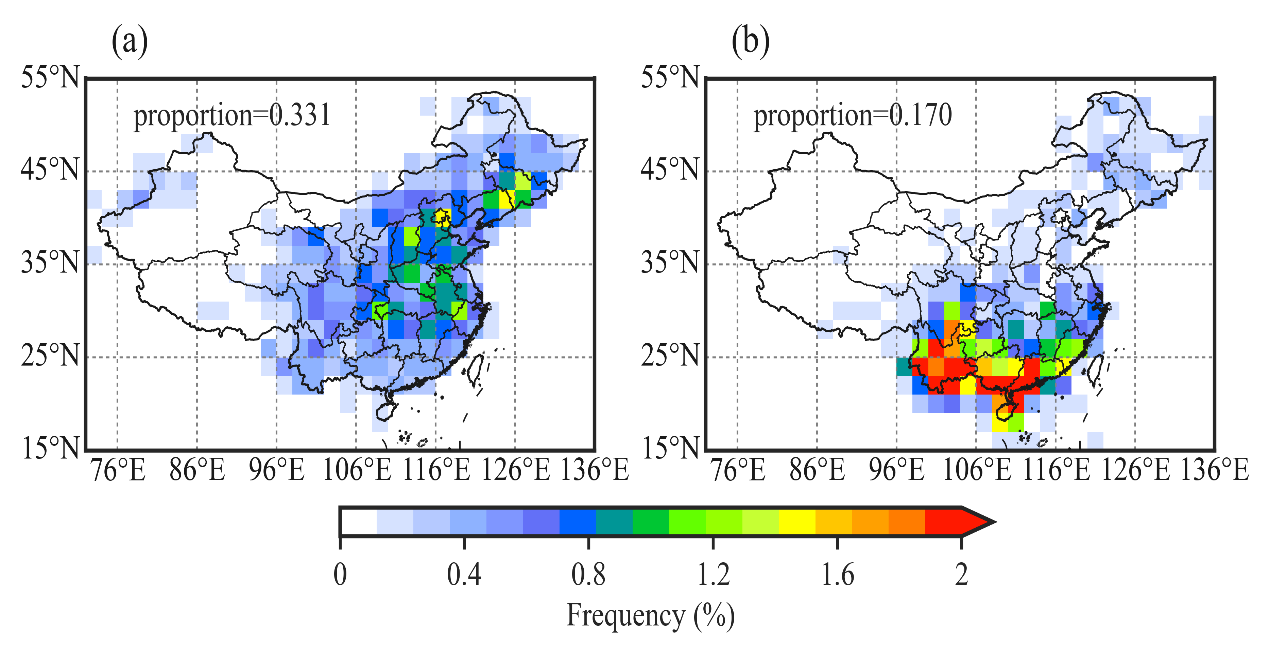


**Fig S6** Frequency distributions of eastward (a) and westward (b) convective cloud clusters over China.

**
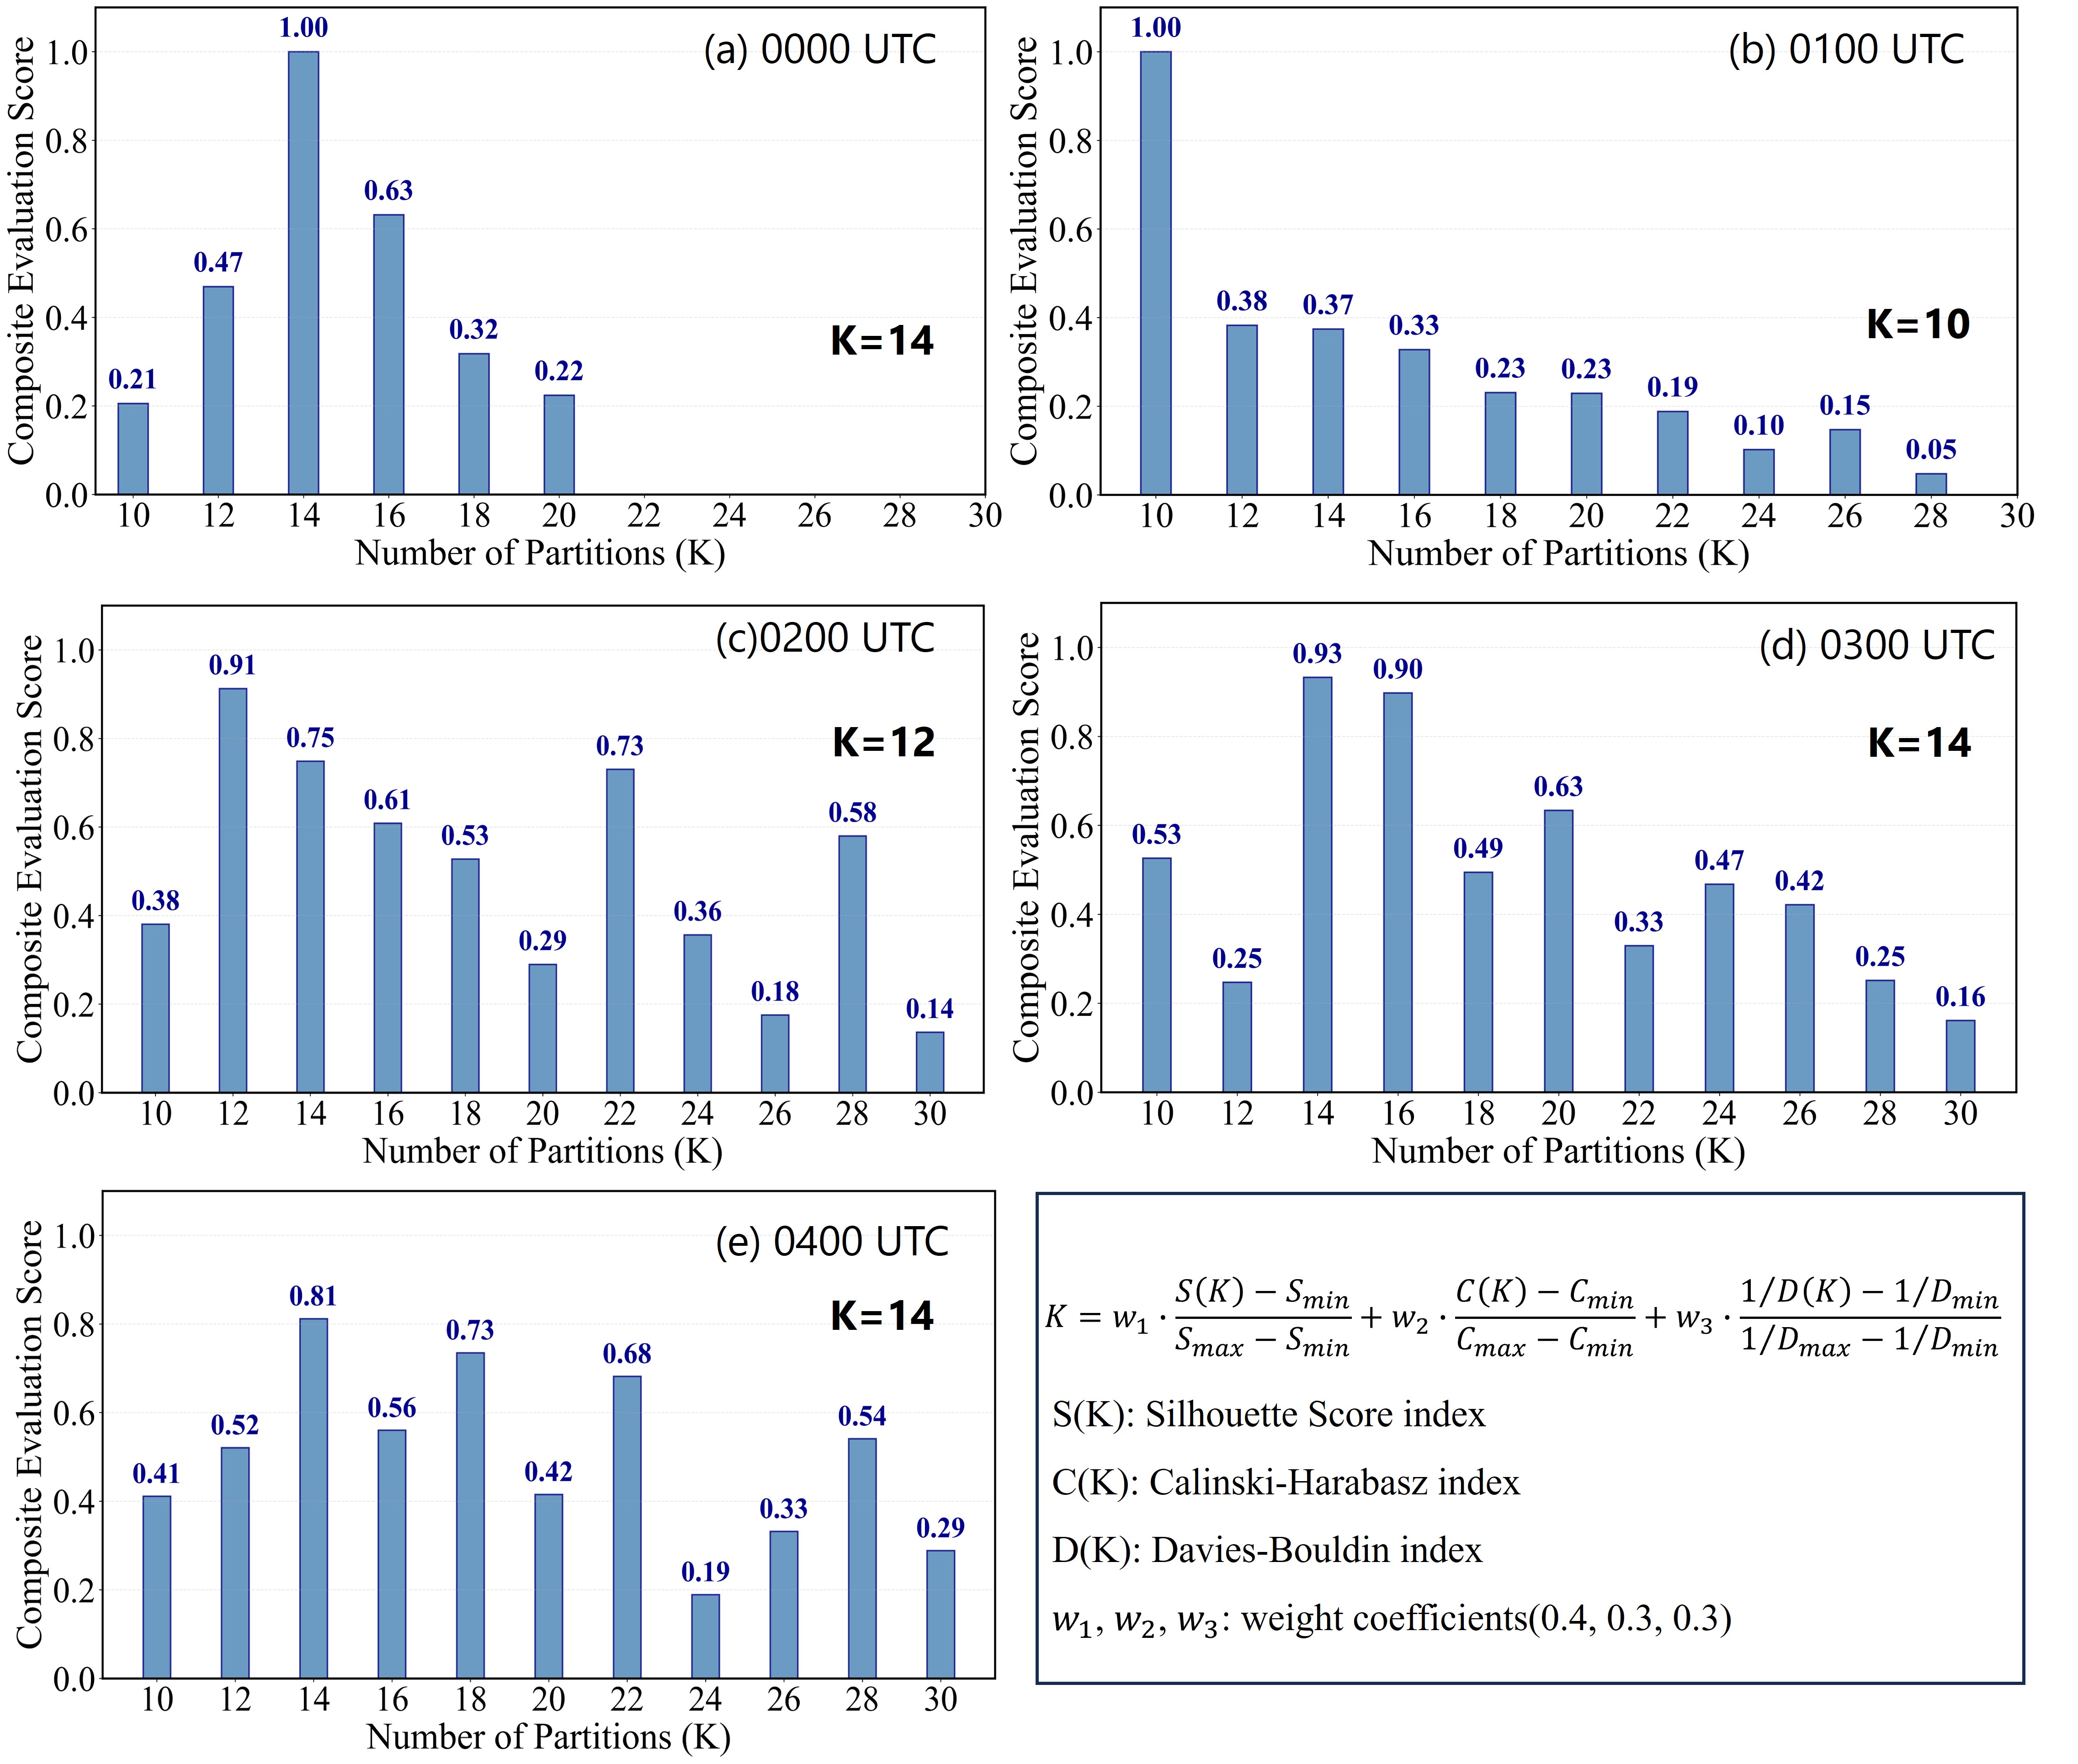
**

**Fig S7**. Determination of optimal Voronoi partition number K for the case study on 1 June 2022. Composite index scores (combining Silhouette, Calinski–Harabasz, and Davies–Bouldin metrics) as a function of candidate cluster number K at five successive times: (a) 00:00 UTC (optimal K = 14), (b) 01:00 UTC (K = 10), (c) 02:00 UTC (K = 12), (d) 03:00 UTC (K = 14), (e) 04:00 UTC (K = 14). The optimal K (marked by a red asterisk) is selected as the value maximising the composite index score. Higher composite scores indicate more distinct and coherent Voronoi sub-regions.
